# Supplementary material for: Ab initio crystal structure prediction by combining symmetry analysis representations and total energy calculations. An insight into the structure of Mg(BH4)2
Source: Royal Society of Chemistry journal article supplement (doi:10.1039/c2cp43090h), 2012-11-22
Supplement: c2cp43090h.pdf [file c2cp43090h.pdf]

***Ab-initio* crystal structure prediction by combining symmetry  
analysis representations and total energy calculations. An insight  
into the structure of  $\text{Mg}(\text{BH}_4)_2$**

Riccarda Caputo\*

*ETH Zürich, Department of Chemistry and Applied Biosciences,  
Lab Inorganic Chemistry, Wolfgang-Pauli Strasse 10, CH-8093 Zürich, Switzerland*

Arkadiusz Kupczak and Wiesława Sikora  
*AGH University of Science and Technology,  
Faculty of Physics and Applied Computer Science,  
Department of Condensed Matter Physics, PL-30059, Cracow, Poland*

Adem Tekin

*Istanbul Technical University, Informatics Institute, 34469 Maslak, Istanbul, Turkey*

---

\*E-mail: riccarda.caputo@inorg.chem.ethz.ch

| Atom type | Atomic positions in $I4_1/amd$<br>as well in $I\bar{4}m2$<br>without displacements | Symmetry allowed<br>displacements from<br>$I4_1/amd$ to $I\bar{4}m2$ | Atomic position in<br>$I\bar{4}m2$ from our optimization |
|-----------|------------------------------------------------------------------------------------|----------------------------------------------------------------------|----------------------------------------------------------|
| Mg        | (0, 0, 0)                                                                          | Inactive                                                             | (0, 0, 0)                                                |
|           | (0.5, 0.5, 0.5)                                                                    | Inactive                                                             | (0.5, 0.5, 0.5)                                          |
| B         | (0.266, 0, 0.894)                                                                  | [A1, 0, B1]                                                          | (0.269, 0, 0.9)                                          |
|           | (0.734, 0, 0.894)                                                                  | [-A1, 0, B1]                                                         | (0.731, 0, 0.9)                                          |
|           | (0, 0.734, 0.106)                                                                  | [0, -A1, -B1]                                                        | (0, 0.731, 0.1)                                          |
|           | (0.5, 0.234, 0.606)                                                                | [0, -A1, -B1]                                                        | (0.5, 0.231, 0.6)                                        |
|           | (0.766, 0.5, 0.394)                                                                | [A1, 0, B1]                                                          | (0.769, 0.5, 0.4)                                        |
|           | (0.234, 0.5, 0.394)                                                                | [-A1, 0, B1]                                                         | (0.231, 0.5, 0.4)                                        |
|           | (0, 0.266, 0.106)                                                                  | [0, A1, -B1]                                                         | (0, 0.269, 0.1)                                          |
|           | (0, 0.734, 0.106)                                                                  | [0, -A1, -B1]                                                        | (0, 0.731, 0.1)                                          |
| H1        | (0.137, 0, 0.837)                                                                  | [A2, 0, B2]                                                          | (0.143, 0, 0.835)                                        |
|           | (0.863, 0, 0.837)                                                                  | [-A2, 0, B2]                                                         | (0.857, 0, 0.835)                                        |
|           | (0, 0.863, 0.163)                                                                  | [0, -A2, -B2]                                                        | (0, 0.857, 0.165)                                        |
|           | (0, 0.137, 0.163)                                                                  | [0, A2, -B2]                                                         | (0, 0.143, 0.165)                                        |
|           | (0.637, 0.5, 0.337)                                                                | [A2, 0, B2]                                                          | (0.643, 0.5, 0.335)                                      |
|           | (0.363, 0.5, 0.337)                                                                | [-A2, 0, B2]                                                         | (0.357, 0.5, 0.335)                                      |
|           | (0.5, 0.363, 0.663)                                                                | [0, -A2, -B2]                                                        | (0.5, 0.357, 0.665)                                      |
|           | (0.5, 0.637, 0.663)                                                                | [0, A2, -B2]                                                         | (0.5, 0.643, 0.665)                                      |
| H2        | (0.253, 0, 0.011)                                                                  | [A3, 0, B3]                                                          | (0.252, 0, 0.018)                                        |
|           | (0.747, 0, 0.011)                                                                  | [-A3, 0, B3]                                                         | (0.748, 0, 0.018)                                        |
|           | (0.5, 0.753, 0.489)                                                                | [0, A3, -B3]                                                         | (0.5, 0.752, 0.482)                                      |
|           | (0.5, 0.247, 0.489)                                                                | [0, -A3, -B3]                                                        | (0.5, 0.248, 0.482)                                      |
|           | (0.753, 0.5, 0.511)                                                                | [A3, 0, B3]                                                          | (0.752, 0.5, 0.518)                                      |
|           | (0.247, 0.5, 0.511)                                                                | [-A3, 0, B3]                                                         | (0.248, 0.5, 0.518)                                      |
|           | (0, 0.253, 0.989)                                                                  | [0, A3, -B3]                                                         | (0, 0.252, 0.982)                                        |
|           | (0, 0.747, 0.989)                                                                  | [0, -A3, -B3]                                                        | (0, 0.748, 0.982)                                        |
| H3        | (0.375, 0.837, 0.635)                                                              | [B4, -A4, C4]                                                        | (0.375, 0.84, 0.625)                                     |

|                       |                 |                      |
|-----------------------|-----------------|----------------------|
| (0.625, 0.163, 0.635) | [-B4, A4, C4]   | (0.625, 0.16,0.625)  |
| (0.337, 0.875, 0.865) | [-A4, B4, -C4]  | (0.34, 0.875, 0.875) |
| (0.663, 0.125, 0.865) | [-B4, A4, -C4]  | (0.66, 0.125, 0.875) |
| (0.375, 0.163, 0.635) | [B4, A4, C4]    | (0.375, 0.16, 0.625) |
| (0.625, 0.837, 0.635) | [-B4, -A4, C4]  | (0.625, 0.84, 0.625) |
| (0.337, 0.125, 0.865) | [-A4, -B4, -C4] | (0.34, 0.125, 0.875) |
| (0.663, 0.875, 0.865) | [A4, B4, -C4]   | (0.66, 0.875, 0.875) |
| (0.875, 0.337, 0.135) | [B4, -A4, C4]   | (0.875, 0.34,0.125)  |
| (0.125, 0.663, 0.135) | [-B4, A4, C4]   | (0.125, 0.66, 0.125) |
| (0.837, 0.375, 0.365) | [-A4, B4, -C4]  | (0.84, 0.375, 0.375) |
| (0.163, 0.625, 0.365) | [A4, -B4, -C4]  | (0.16,0.625, 0.375)  |
| (0.875, 0.663, 0.135) | [B4, A4,C4]     | (0.875, 0.66, 0.125) |
| (0.125, 0.337, 0.135) | [-B4, -A4, C4]  | (0.125, 0.34, 0.125) |
| (0.837, 0.625, 0.365) | [-A4, -B4, -C4] | (0.84, 0.625,0.375)  |
| (0.163, 0.375,0.365)  | [A4, B4, -C4]   | (0.16, 0.375, 0.375) |

TABLE I: Symmetry group correspondence  $I4_1/amd \rightarrow \bar{I}4m2$ . Agreement between optimized structures and the ones coming from symmetry analysis is reached for:  $A1 = 0.003$ ,  $B1 = 0.006$ ,  $A2 = 0.006$ ,  $B2 = -0.002$ ,  $A3 = -0.001$ ,  $B3 = 0.007$ ,  $A4 = -0.03$ ,  $B4 = 0$ ,  $C4 = -0.01$ .

|         | $I4_1/amd$ | $I\bar{4}m2$ | $F222$  | $C222_1$ |
|---------|------------|--------------|---------|----------|
| Mg      | 4a         | 2a           | 4a      | 4a, 4b   |
|         |            | 2c           | 4c      | 4a, 4b   |
|         | 4b         | 2b           | 4b      | 8c       |
|         |            | 2d           | 4d      | 8c       |
| B,H1,H2 | 16h        | 2x(8i)       | 2x(16k) | 8x(8c)   |
| H3      | 32i        | 2x(16j)      | 4x(16k) | 16x(8c)  |

TABLE II. Splitting of Wyckoff positions along  $I4_1/amd \rightarrow I\bar{4}m2 \rightarrow F222 \rightarrow C222_1$  group-subgroup pathway.

|         | $I4_1/amd$ | $Fddd$  | $F222$  | $C222_1$ |
|---------|------------|---------|---------|----------|
| Mg      | 4a         | 8a      | 4a      | 4a, 4b   |
|         |            |         | 4b      | 8c       |
|         | 4b         | 8b      | 4c      | 4a, 4b   |
|         |            |         | 4d      | 8c       |
| B,H1,H2 | 16h        | 32h     | 2x(16k) | 8x(8c)   |
| H3      | 32i        | 2x(32h) | 4x(16k) | 16x(8c)  |

TABLE III. Splitting of Wyckoff positions along  $I4_1/amd \rightarrow Fddd \rightarrow F222 \rightarrow C222_1$  group-subgroup pathway.

|         | $I4_1/amd$ | $I4_122$ | $F222$  | $C222_1$ |
|---------|------------|----------|---------|----------|
| Mg      | 4a         | 4a       | 4a      | 4a, 4b   |
|         |            |          | 4c      | 4a, 4b   |
|         | 4b         | 4b       | 4b      | 8c       |
|         |            |          | 4d      | 8c       |
| B,H1,H2 | 16h        | 16g      | 2x(16k) | 8x(8c)   |
| H3      | 32i        | 2x(16g)  | 4x(16k) | 16x(8c)  |

TABLE IV. Splitting of Wyckoff positions along  $I4_1/amd \rightarrow I4_122 \rightarrow F222 \rightarrow C222_1$  group-subgroup pathway.

| Symmetry group No | a      | b      | c      |      |
|-------------------|--------|--------|--------|------|
| $C222_1$ (No 20)  | 11.546 | 11.686 | 20.997 |      |
| atom              | x      | y      | z      | site |
| Mg                | 0      | 0      | 0      | 4a   |
| Mg                | 0.25   | 0.25   | 0.125  | 8c   |
| Mg                | 0      | 0.5    | 0.25   | 4b   |
| B                 | 0.3653 | 0.3669 | 0.0518 | 8c   |
| H                 | 0.0718 | 0.0671 | 0.5813 | 8c   |
| H                 | 0.3722 | 0.3721 | 0.4938 | 8c   |
| H                 | 0.2347 | 0.3927 | 0.1849 | 8c   |
| H                 | 0.3953 | 0.2301 | 0.1835 | 8c   |
| B                 | 0.1347 | 0.1330 | 0.0519 | 8c   |
| B                 | 0.1348 | 0.3670 | 0.1983 | 8c   |
| B                 | 0.3654 | 0.1331 | 0.1982 | 8c   |
| H                 | 0.0719 | 0.0668 | 0.0814 | 8c   |
| H                 | 0.0720 | 0.4331 | 0.1687 | 8c   |
| H                 | 0.4283 | 0.0670 | 0.1687 | 8c   |
| H                 | 0.1278 | 0.1278 | 0.4937 | 8c   |
| H                 | 0.1279 | 0.3723 | 0.2564 | 8c   |
| H                 | 0.3725 | 0.1279 | 0.2563 | 8c   |
| H                 | 0.2656 | 0.1076 | 0.1848 | 8c   |
| H                 | 0.2654 | 0.3926 | 0.0653 | 8c   |
| H                 | 0.2346 | 0.1076 | 0.0653 | 8c   |
| H                 | 0.1050 | 0.2700 | 0.1836 | 8c   |
| H                 | 0.1048 | 0.2300 | 0.0667 | 8c   |
| H                 | 0.3950 | 0.2698 | 0.0665 | 8c   |

TABLE V. Wyckoff positions of the orthorhombic structure  $C222_1$  (No 20) optimized at DFT level. The lattice parameters are in Å.

| Symmetry group No   | a      | b      | c      |      |
|---------------------|--------|--------|--------|------|
| <i>F222</i> (No 22) | 10.278 | 11.361 | 11.946 |      |
| atom                | x      | y      | z      | site |
| 6 Mg                | 0.25   | 0.25   | 0.25   | 4c   |
| 7 Mg                | 0      | 0      | 0      | 4a   |
| 1 B                 | 0.1478 | 0.1129 | 0.1190 | 16k  |
| 2 H                 | 0.1153 | 0.1479 | 0.0262 | 16k  |
| 3 H                 | 0.0859 | 0.1708 | 0.1876 | 16k  |
| 4 H                 | 0.1247 | 0.0093 | 0.1388 | 16k  |
| 5 H                 | 0.2662 | 0.1234 | 0.1234 | 16k  |

TABLE VI. Wyckoff positions of the orthorhombic structure *F222* (No 22) optimized at DFT level. The lattice parameters are in Å.

| Symmetry group No   | a      | b      | c      |      |
|---------------------|--------|--------|--------|------|
| <i>Fddd</i> (No 70) | 10.936 | 11.085 | 12.368 |      |
| atom                | x      | y      | z      | site |
| Mg                  | 0.125  | 0.125  | 0.625  | 8b   |
| Mg                  | 0.125  | 0.125  | 0.125  | 8a   |
| B                   | 0.2662 | 0.0144 | 0.0010 | 32h  |
| H                   | 0.2167 | 0.2844 | 0.3263 | 32h  |
| H                   | 0.3771 | 0.0004 | 0.0055 | 32h  |
| H                   | 0.0267 | 0.2807 | 0.0831 | 32h  |
| H                   | 0.0018 | 0.1229 | 0.2583 | 32h  |

TABLE VII. Wyckoff positions of the orthorhombic structure *Fddd* (No 70) optimized at DFT level. The lattice parameters are in Å.

| Symmetry group No     | a      | b      | c      |      |
|-----------------------|--------|--------|--------|------|
| $I\bar{4}m2$ (No 119) | 8.198  | 8.198  | 10.449 |      |
| atom                  | x      | y      | z      | site |
| 2 Mg                  | 0      | 0.5    | 0.75   | 2d   |
| 3 Mg                  | 0      | 0      | 0      | 2a   |
| 1 H                   | 0.1608 | 0.1264 | 0.1188 | 16j  |
| 4 B                   | 0.2322 | 0      | 0.1463 | 8i   |
| 5 H                   | 0.3608 | 0      | 0.0860 | 8i   |
| 6 H                   | 0.2455 | 0      | 0.2629 | 8i   |

TABLE VIII. Wyckoff positions of the tetragonal structure  $I\bar{4}m2$  (No 119) optimized at DFT level. The lattice parameters are in Å.

| Symmetry group No   | a      | b      | c      |      |
|---------------------|--------|--------|--------|------|
| $I4_1/amd$ (No 141) | 8.401  | 8.401  | 10.668 |      |
| atom                | x      | y      | z      | site |
| Mg                  | 0      | 0.75   | 0.125  | 4a   |
| Mg                  | 0      | 0.25   | 0.375  | 4b   |
| H                   | 0.1225 | 0.0853 | 0.2593 | 32i  |
| B                   | 0      | 0.0155 | 0.2307 | 16h  |
| H                   | 0      | 0.6116 | 0.2871 | 16h  |
| H                   | 0      | 0.0033 | 0.1163 | 16h  |

TABLE IX. Wyckoff positions of the tetragonal structure  $I4_1/amd$  (No 141) optimized at DFT level. The lattice parameters are in Å.

| Symmetry group No     | a      | b      | c      |      |
|-----------------------|--------|--------|--------|------|
| $Fd\bar{3}m$ (No 227) | 12.600 |        |        |      |
| atom                  | x      | y      | z      | site |
| Mg                    | 0.375  | 0.375  | 0.375  | 8b   |
| Mg                    | 0.125  | 0.125  | 0.125  | 8a   |
| B                     | 0.2664 | 0.2664 | 0.2664 | 32e  |
| H                     | 0.2093 | 0.2093 | 0.2093 | 32e  |
| H                     | 0.0053 | 0.0053 | 0.3580 | 96g  |

TABLE X. Wyckoff positions of the cubic structure  $Fd\bar{3}m$  (No 227) optimized at DFT level. The lattice parameters are in  $\text{\AA}$ .



| Symmetry No            | wave numbers $\text{cm}^{-1}$  | mode                  |
|------------------------|--------------------------------|-----------------------|
| 22<br><br>ZPE = 2.180  | 401.11, 409.24                 | rotation              |
|                        | 1227.31, 1228.86, 1231.08      | bending               |
|                        | 2289.67, 2291.68               | symmetric stretching  |
|                        | 2323.87, 2330.29, 2340.70      | asymmetric stretching |
|                        | 2395.28, 2400.46, 2404.92      |                       |
| 70<br><br>ZPE = 2.169  | 345.89, 346.91, 347.81         | rotation              |
|                        | 1210.57, 1213.17, 1216.15      | bending               |
|                        | 2346.89, 2347.17, 2348.59      | asymmetric stretching |
|                        | 2364.32, 2379.70, 2394.73      |                       |
| 119<br><br>ZPE = 2.173 | 394.90, 404.05                 | rotation              |
|                        | 1225.80 (x2), 1229.15          | bending               |
|                        | 2286.86 (x2)                   | symmetric stretching  |
|                        | 2325.95 (x2), 2341.67          | asymmetric stretching |
|                        | 2370.66 (x2), 2393.12, 2402.42 |                       |
| 164<br><br>ZPE = 2.221 | 149.64 (x2), 321.72, 527.09    | rotation              |
|                        | 2343.36 (x2), 2415.96          | asymmetric stretching |
| 227<br><br>ZPE = 2.019 | 403.46                         | rotation              |
|                        | 1130.86(x3)                    | bending               |
|                        | 2355.83 (x3)                   | symmetric stretching  |
|                        | 2436.75 (x3), 2491.89 (x3)     | asymmetric stretching |

TABLE XI. Calculated (DFT level) wave numbers of the IR-active modes of vibration of selected structures, which IR spectra are reported in Figure 6. The zero-point energy (ZPE) is expressed in eV per formula unit.

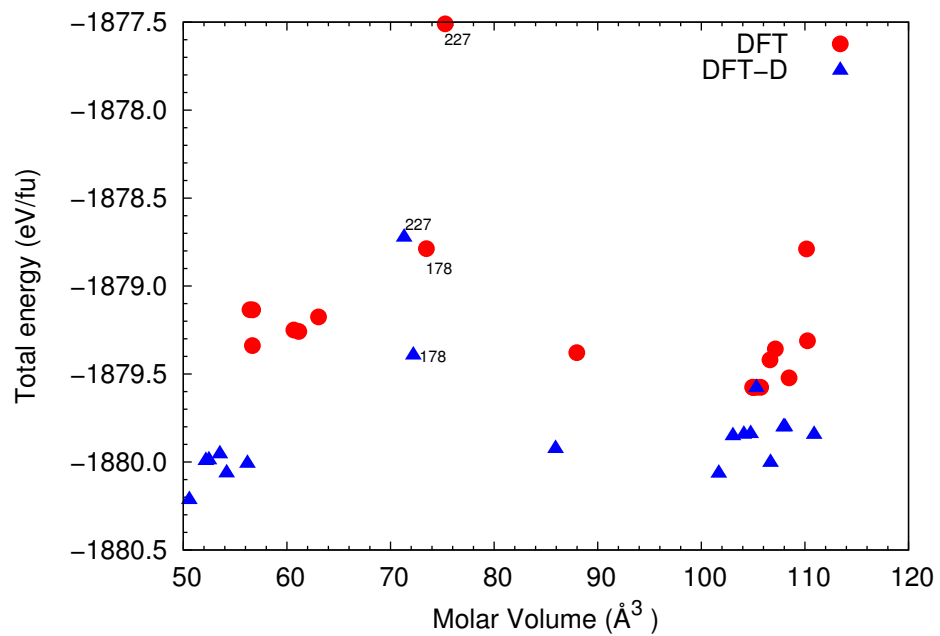

FIG. 1. The  $E - V$  curve of optimized structures, calculated at DFT and DFT-D level of theory.
